# Supplementary material for: A mechanically durable, sustained corrosion-resistant photothermal nanofiber membrane for highly efficient solar distillation
Source: Royal Society of Chemistry journal article supplement (doi:10.1039/c9ta05042f), 2019-01-01
Supplement: c9ta05042f1.pdf [file c9ta05042f1.pdf]

**Supplementary information for**

**Mechanically durable, sustained corrosion-resistant photothermal  
nanofiber membrane for highly efficient solar distillation**

Ying Xu<sup>a</sup>, Hongbo Xu<sup>b</sup>, Zhigao Zhu<sup>a</sup>, Haoqing Hou<sup>c</sup>, Jinlong Zuo<sup>d</sup>, Fuyi

Cui<sup>a</sup>, Dongmei Liu<sup>\*a</sup>, Wei Wang<sup>\*a</sup>

<sup>a</sup> State Key Laboratory of Urban Water Resource and Environment,  
School of Environment, Harbin Institute of Technology, Harbin 150090,  
China.

<sup>b</sup> School of Chemistry and Chemical Engineering, Harbin Institute of  
Technology, Harbin 150090, China

<sup>c</sup> Department of Chemistry and Chemical Engineering, Jiangxi Normal  
University, Nanchang 330022, China

<sup>d</sup> Department of Environmental Engineering, Harbin University of  
Commerce, Harbin 150076, China

## Section 1 The energy consumption calculation.

The thermal-insulating reduced heat loss of the whole evaporation including 1) radiation loss  $P_{rad}$ , 2) convection loss  $P_{conv}$  and 3) conduction loss  $P_{cond}$ , detailed thermal loss analysis was performed as following calculations.

The radiation flux  $P_{rad}$  can be calculated by Stefan-Boltzmann law.

$$P_{rad} = \varepsilon \sigma (T_1^4 - T_2^4) \quad (1)$$

Where  $\varepsilon$  is the emissive rate (0.93),  $\sigma$  is the Stefan-Boltzmann constant (assumed to be  $5.67 \times 10^{-8} \text{ W (m}^2 \cdot \text{K}^4)^{-1}$ ),  $T_1$  is the average temperature of the absorber (38.5 °C), and  $T_2$  is the ambient temperature (36.4 °C, the vapor temperature). The top surface of the absorber is surrounded by heated vapor, which is very close to the temperature of membrane surface, the radiative and convective loss should be very small. As a result, the radiation heat flux is estimated to be 13.82 W/m<sup>2</sup>, the radiation loss is about 1.4%.

The convection loss  $P_{conv}$  can be calculated by Newton's law of cooling.

$$P_{conv} = h(T_1 - T_2) \quad (2)$$

where  $P_{conv}$  denotes convection heat flux,  $h$  is the convection heat transfer coefficient (assumed to be  $10 \text{ W (m}^2 \text{ K)}^{-1}$ ). Here, the convection heat is estimated as  $\approx 21 \text{ W/m}^2$ , and the convection loss is about 2.1%.

The Conduction loss  $P_{cond}$  is based on Fourier's law.

$$P_{cond} = \frac{A'}{A} q_{water} \quad (3)$$

$$q_{water} = \kappa \frac{\Delta T}{\Delta L} \quad (4)$$

Where the  $A'$  is the direct contact area between water and membrane, the  $q_{water}$  is the heat flux transferred to water. With the occupation of water, the thermal conductivity  $\kappa$

is closed to water ( $0.599 \text{ W/m}\cdot\text{K}^{-1}$ ), the  $\Delta T/\Delta L$  is approximate  $100 \text{ K/m}$  and  $A'/A$  was estimated to be  $0.2$ . Thus, the conductive loss is about  $5.99 \text{ W/m}^2$  and the heat loss rate is about  $1.2\%$ .

Table S1. The XPS elements compositions of the PI, PPy@PI and PDA/PEI/PPy@PI NFMs.

|     | PI membrane | PPy@PI membrane | PDA/PEI/PPy@PI membrane |
|-----|-------------|-----------------|-------------------------|
| C1s | 60.65%      | 56.96%          | 52.64%                  |
| N1s | 4.79%       | 13.85%          | 15.64%                  |
| O1s | 34.56%      | 29.19%          | 31.72%                  |

Table S2. The comparison of the substrates of the membrane-based evaporators on swelling problem in the reported in literatures.

| Evaporator                                      | Substrate         | Water absorber    | Whether there is a swelling problem (Yes or No) |
|-------------------------------------------------|-------------------|-------------------|-------------------------------------------------|
| RGO-paper <sup>1, 2</sup>                       | Airlaid paper     | Airlaid paper     | Yes                                             |
| RGO-Fe <sub>3</sub> O <sub>4</sub> <sup>3</sup> | Airlaid paper     | Airlaid paper     | Yes                                             |
| Carbonized wood <sup>4</sup>                    | Airlaid paper     | Airlaid paper     | Yes                                             |
| RGO- film <sup>5</sup>                          | Cellulose filters | Cellulose filters | Yes                                             |
| Carbon nano-particles <sup>6</sup>              | Cellulose filters | Cellulose filters | Yes                                             |
| GO <sup>7, 8</sup>                              | Filter paper      | Filter paper      | Yes                                             |
| Au <sup>9</sup>                                 | Filter paper      | Filter paper      | Yes                                             |
| PPy-paper <sup>10</sup>                         | Wiping paper      | Wiping paper      | Yes                                             |
| PDA <sup>11</sup>                               | Bacterial         | Bacterial         | Yes                                             |

|                                                 |                |                  |               |     |
|-------------------------------------------------|----------------|------------------|---------------|-----|
|                                                 |                | Nanocellulose    | Nanocellulose |     |
| Carbon nanotube <sup>12</sup>                   |                | Silicon/PEG      | Silicon/PEG   | Yes |
| PVDF <sup>13</sup>                              |                | PVA              | PVA           | Yes |
| Carbon nano-<br>particles <sup>14</sup>         | PVDF           | PAN              |               | Yes |
| RGO sheets <sup>15</sup>                        | Self-assemble  | Glass-fibers     |               | Yes |
| Ag/diatomite <sup>16</sup>                      | diatomite      | Airlaid paper    |               | Yes |
| Cu <sub>2</sub> SnSe <sub>3</sub> <sup>17</sup> | Fiber membrane | Nonwoven fabrics |               | Yes |

---

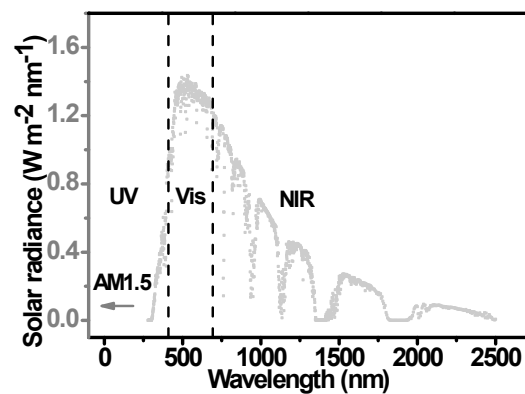

Figure S1. The solar spectral irradiance spectrum (AM 1.5 G).

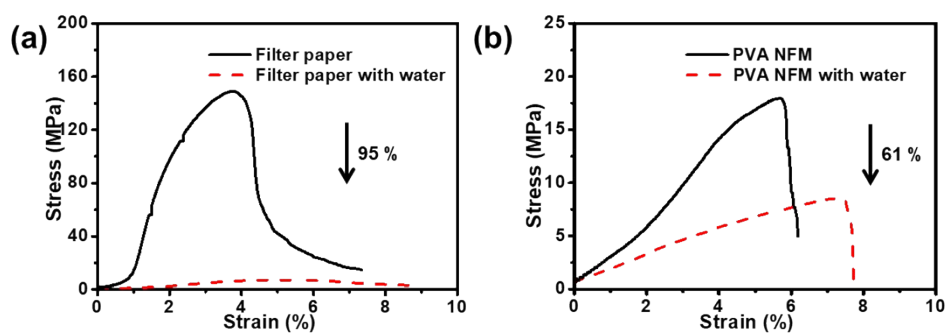

Fig. S2. (a) The tensile stress curves of filter paper at both dry and wet state. (b) The tensile stress curves of PVA NFM at both dry and wet state.

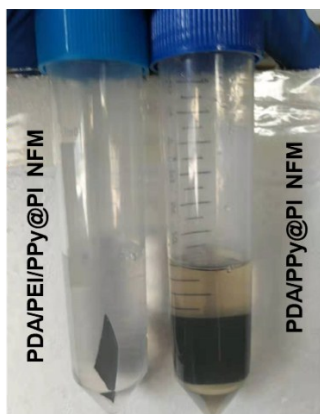

Fig. S3. The photographs of PDA/PPy@PI NFM and PDA/PEI/PPy@PI NFM immersion in alkali solution.

## Reference

1. J. Lou, Y. Liu, Z. Wang, D. Zhao, C. Song, J. Wu, N. Dasgupta, W. Zhang, D. Zhang, P. Tao, W. Shang and T. Deng, *ACS Appl. Mater. Interfaces*, 2016, **8**, 14628-14636.
2. Z. Wang, Q. Ye, X. Liang, J. Xu, C. Chang, C. Song, W. Shang, J. Wu, P. Tao and T. Deng, *J. Mater. Chem. A*, 2017, **5**, 16359-16368.
3. Y. Liu, X. Wang and H. Wu, *Chem. Eng. J.*, 2017, **309**, 787-794.
4. P.-F. Liu, L. Miao, Z. Deng, J. Zhou, H. Su, L. Sun, S. Tanemura, W. Cao, F. Jiang and L.-D. Zhao, *Materials Today Energy*, 2018, **8**, 166-173.
5. X. Li, W. Xu, M. Tang, L. Zhou, B. Zhu, S. Zhu and J. Zhu, *Proc. Natl. Acad. Sci. U S A*, 2016, **113**, 13953-13958.
6. Z. Liu, H. Song, D. Ji, C. Li, A. Cheney, Y. Liu, N. Zhang, X. Zeng, B. Chen, J. Gao, Y. Li, X. Liu, D. Aga, S. Jiang, Z. Yu and Q. Gan, *Global Chall*, 2017, **1**, 1600003.
7. C. Finnerty, L. Zhang, D. L. Sedlak, K. L. Nelson and B. Mi, *Environ. Sci. Technol.*, 2017, **51**, 11701-11709.
8. A. Guo, X. Ming, Y. Fu, G. Wang and X. Wang, *ACS Appl. Mater. Interfaces*, 2017, **9**, 29958-29964.
9. X. Wang, Y. He, X. Liu, G. Cheng and J. Zhu, *Appl. Energy*, 2017, **195**, 414-425.
10. Y. Xu, D. Liu, H. Xiang, S. Ren, Z. Zhu, D. Liu, H. Xu, F. Cui and W. Wang, *J. Membrane Sci.*, 2019, DOI: 10.1016/j.memsci.2019.05.068.
11. Q. Jiang, H. G. Derami, D. Ghim, S. Cao, Y.-S. Jun and S. Singamaneni, *J. Mater. Chem. A*, 2017, **5**, 18397-18402.
12. Y. Wang, L. Zhang and P. Wang, *ACS Sustain. Chem. Engin.*, 2016, **4**, 1223-1230.
13. G. Xue, Q. Chen, S. Lin, J. Duan, P. Yang, K. Liu, J. Li and J. Zhou, *Global Chall.*, 2018, **2**, 1800001.
14. T. Gao, Y. Li, C. Chen, Z. Yang, Y. Kuang, C. Jia, J. Song, E. M. Hitz, B. Liu, H. Huang,

- J. Yu, B. Yang and L. Hu, *Small Methods*, 2019, **3**, 1800176.
15. P. Zhang, J. Li, L. Lv, Y. Zhao and L. Qu, *ACS Nano*, 2017, **11**, 5087-5093.
16. J. Fang, Q. Liu, W. Zhang, J. Gu, Y. Su, H. Su, C. Guo and D. Zhang, *J. Mater. Chem. A*, 2017, **5**, 17817-17821.
17. Y. Yang, H. Zhao, Z. Yin, J. Zhao, X. Yin, N. Li, D. Yin, Y. Li, B. Lei, Y. Du and W. Que, *Mater. Horiz.*, 2018, **5**, 1143-1150.
